# Supplementary material for: Structural and biochemical mechanisms of NLRP1 inhibition by DPP9
Source: bioRxiv or medRxiv preprint supplement (doi:10.1101/2020.08.13.250241), 2020-08-14

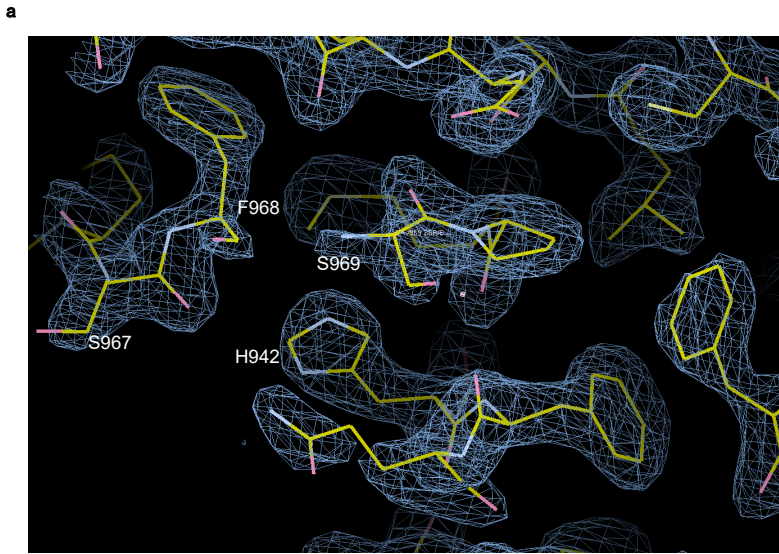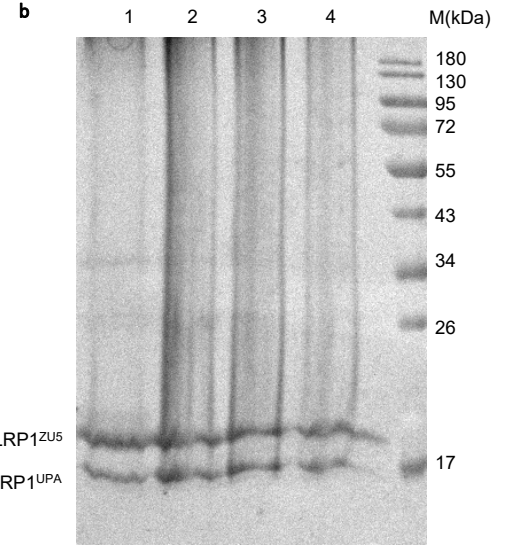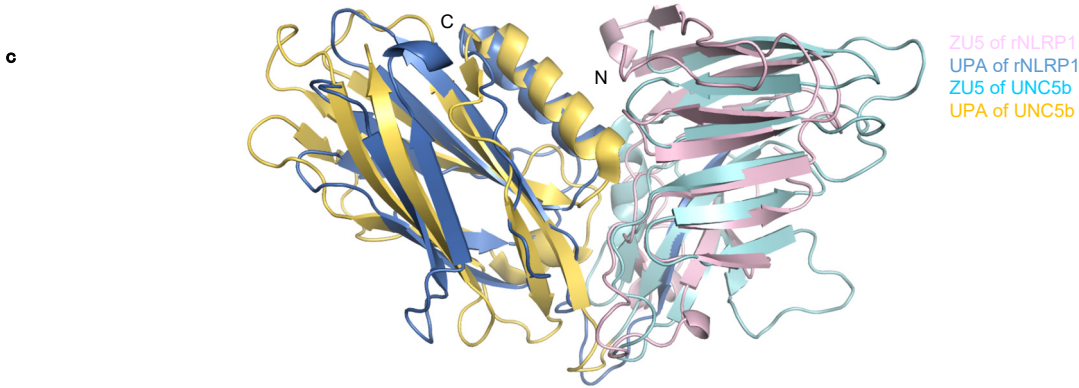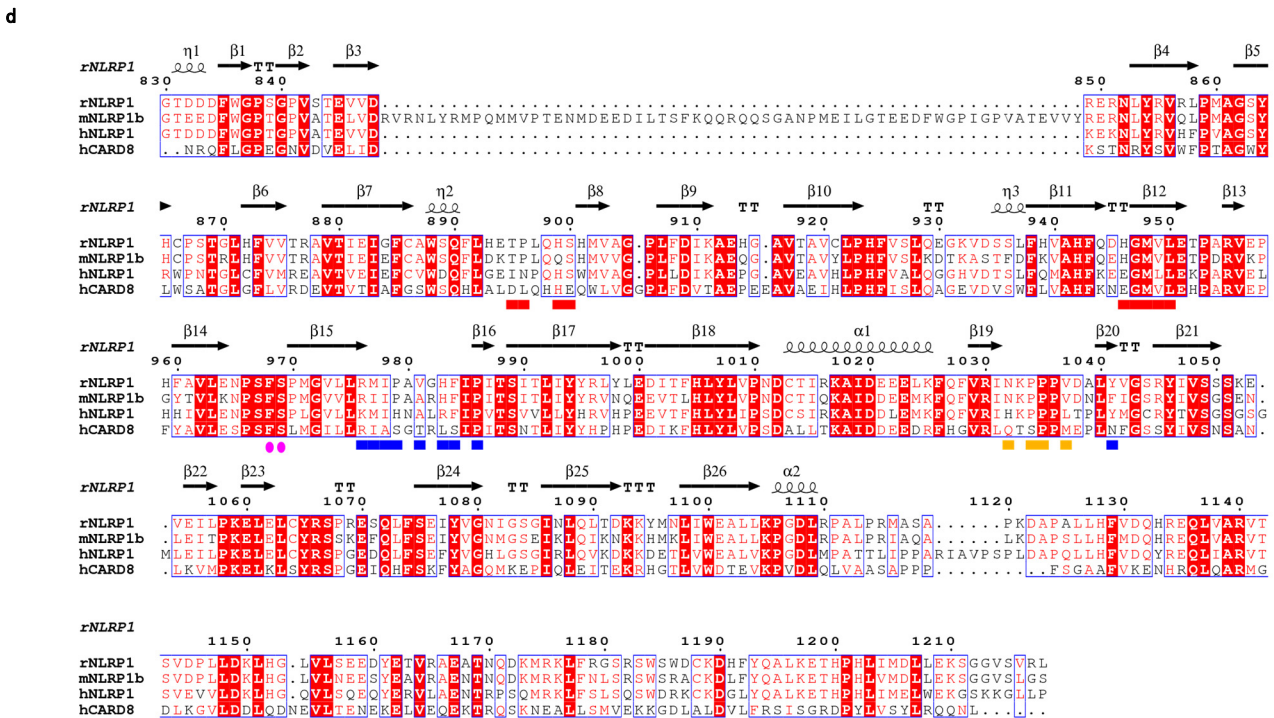

Supplement: Supplementary file [file media-1.pdf]
