# Supplementary material for: Structural and biochemical mechanisms of NLRP1 inhibition by DPP9
Source: bioRxiv or medRxiv preprint supplement (doi:10.1101/2020.08.13.250241), 2020-08-14
Supplement: Supplementary file [file media-5.pdf]

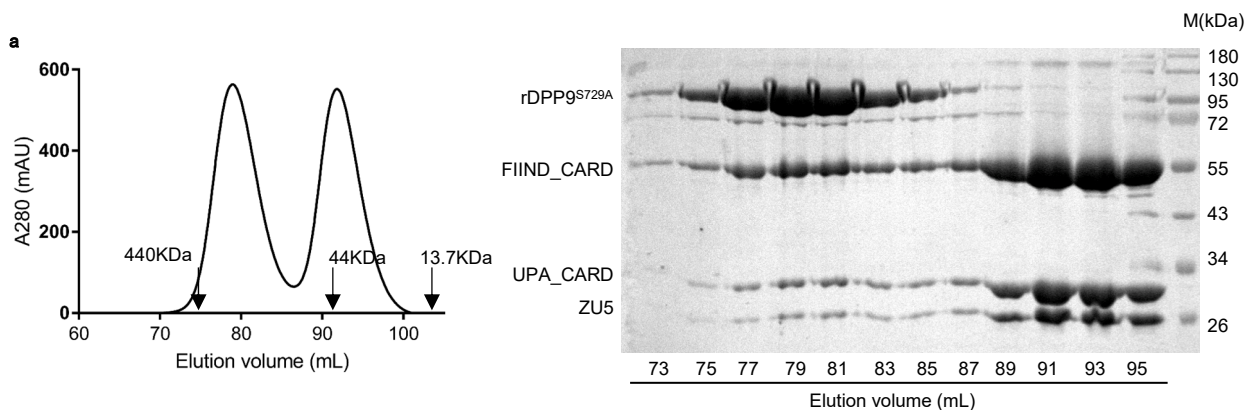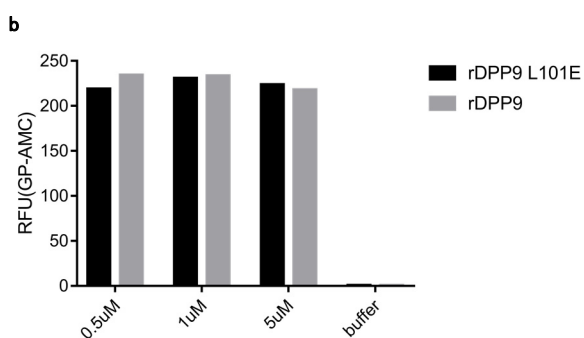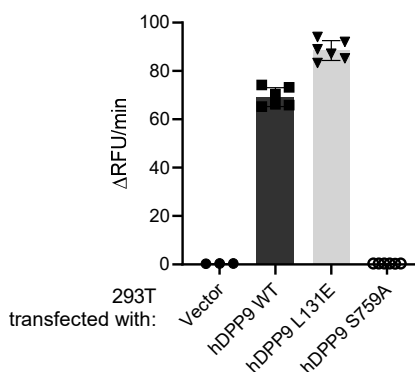

**c** rNLRP1<sub>FIIND</sub> monomer

[Sequence]  
Ser Pro Met Gly Val

[Estimated Sequence]

|                | 1    | 2     | 3    | 4    | 5     |
|----------------|------|-------|------|------|-------|
| 1st            | Ser  | Pro   | Met  | Gly  | Val   |
| 2nd            | Gly  | Asp   | Thr  | Tyr  | Leu   |
| 3rd            | Asp  | Phe   | Ile  | Asn  | Ala   |
| 4th            | His  | Glu   | Leu  | Glu  | Tyr   |
| Reliability(%) | 20.9 | 100.0 | 79.0 | 72.4 | 100.0 |

[Evaluated Value]

|     | 1     | 2     | 3     | 4     | 5     |
|-----|-------|-------|-------|-------|-------|
| Asp | 5.52  | 3.19  | 0.64  | 0.70  | 1.12  |
| Glu | 0.73  | 1.08  | 1.04  | 1.12  | 1.11  |
| Asn | 0.24  | 0.52  | 0.67  | 1.20  | 0.78  |
| Gln | 3.88  | 0.44  | 1.39  | 0.63  | 0.96  |
| Ser | 18.30 | 0.11  | 0.18  | 0.54  | 1.00  |
| Thr | 2.24  | 0.47  | 2.24  | 0.41  | 1.25  |
| His | 4.59  | 0.23  | 0.92  | 0.00  | 0.00  |
| Gly | 7.23  | 0.51  | 0.74  | 11.65 | 0.44  |
| Ala | 2.61  | 0.29  | 1.42  | 0.38  | 1.43  |
| Tyr | 0.87  | 0.86  | 1.04  | 1.40  | 1.26  |
| Arg | 1.29  | 0.20  | 1.23  | 0.62  | 0.83  |
| Met | 1.25  | 0.88  | 19.94 | 0.21  | 0.18  |
| Val | 0.62  | 0.98  | 1.15  | 0.84  | 41.15 |
| Pro | 0.03  | 47.23 | 0.32  | 0.27  | 0.47  |
| Trp | 1.08  | 0.45  | 0.00  | 0.00  | 0.00  |
| Phe | 0.83  | 1.19  | 1.40  | 0.62  | 0.91  |
| Lys | 1.05  | 0.73  | 1.37  | 0.18  | 0.39  |
| Ile | 0.95  | 1.06  | 2.15  | 0.83  | 0.94  |
| Leu | 0.98  | 1.00  | 1.74  | 0.58  | 2.33  |

rNLRP1<sub>FIIND</sub>rDPP9 complex

[Sequence]  
Ser Pro Met Gly Val

[Estimated Sequence]

|                | 1    | 2    | 3    | 4    | 5     |
|----------------|------|------|------|------|-------|
| 1st            | Ser  | Pro  | Met  | Gly  | Val   |
| 2nd            | Leu  | Ile  | Ile  | Asn  | Leu   |
| 3rd            | Gln  | Ala  | Tyr  | Ile  | Ala   |
| 4th            | Gly  | Glu  | Glu  | Glu  | Tyr   |
| Reliability(%) | 36.9 | 68.6 | 81.2 | 48.8 | 100.0 |

[Evaluated Value]

|     | 1     | 2     | 3     | 4     | 5     |
|-----|-------|-------|-------|-------|-------|
| Asp | 0.20  | 1.93  | 0.58  | 0.78  | 0.84  |
| Glu | 0.69  | 2.33  | 1.77  | 1.32  | 0.80  |
| Asn | 0.05  | 0.48  | 0.89  | 2.78  | 0.55  |
| Gln | 3.18  | 0.50  | 0.88  | 0.78  | 0.86  |
| Ser | 19.37 | 0.19  | 0.31  | 0.83  | 0.90  |
| Thr | 1.09  | 0.92  | 1.65  | 1.07  | 0.73  |
| His | 2.49  | 0.14  | 0.84  | 0.34  | 1.01  |
| Gly | 2.87  | 0.88  | 0.60  | 13.75 | 0.38  |
| Ala | 0.64  | 2.49  | 0.73  | 0.77  | 2.10  |
| Tyr | 0.93  | 1.09  | 2.37  | 1.03  | 1.87  |
| Arg | 0.42  | 2.09  | 0.88  | 0.69  | 0.73  |
| Met | 1.01  | 0.99  | 25.91 | 0.31  | 0.02  |
| Val | 0.86  | 1.22  | 1.41  | 1.26  | 37.73 |
| Pro | 0.06  | 26.14 | 0.40  | 0.45  | 1.33  |
| Trp | 1.82  | 0.60  | 0.38  | 0.00  | 0.00  |
| Phe | 0.57  | 1.84  | 0.68  | 1.27  | 1.00  |
| Lys | 1.14  | 0.17  | 1.18  | 0.25  | 1.09  |
| Ile | 0.43  | 3.37  | 3.41  | 2.13  | 0.58  |
| Leu | 4.71  | 0.40  | 1.00  | 1.13  | 2.40  |
