# Supplementary material for: Structural and biochemical mechanisms of NLRP1 inhibition by DPP9
Source: bioRxiv or medRxiv preprint supplement (doi:10.1101/2020.08.13.250241), 2020-08-14
Supplement: Supplementary file [file media-9.pdf]

Extended Data Table 1: X-ray diffraction data collection and refinement statistics

---

|                                                         | PDB ID | Crystal for NLRP1_FIIND<br>7CRV |
|---------------------------------------------------------|--------|---------------------------------|
| <b>Data collection</b>                                  |        |                                 |
| Space group                                             |        | P3121                           |
| Cell dimensions                                         |        |                                 |
| <i>a</i> , <i>b</i> , <i>c</i> (Å)                      |        | 83.96,83.96,156.54              |
| $\alpha$ , $\beta$ , $\gamma$ (°)                       |        | 90,90,120                       |
| Resolution range(Å)                                     |        | 50.00-2.00 (2.03-2.00)          |
| <i>R</i> <sub>sym</sub> (%)                             |        | 8.7 (99)                        |
| <i>I</i> / $\sigma$ <i>I</i>                            |        | 30.9 (2.2)                      |
| Completeness (%)                                        |        | 99.9 (96.5)                     |
| Redundancy                                              |        | 19.3 (16.8)                     |
| <b>Refinement</b>                                       |        |                                 |
| Resolution (Å)                                          |        | 28.76-2.00 (2.07-2.00)          |
| No. reflections                                         |        | 43788 (4250)                    |
| <i>R</i> <sub>work</sub> / <i>R</i> <sub>free</sub> (%) |        | 22.45/25.91 (29.44/34.86)       |
| No. atoms                                               |        | 4542                            |
| Protein residues                                        |        | 571                             |
| B-factors                                               |        | 37.34                           |
| R.M.S deviations                                        |        |                                 |
| Bonds lengths (Å)                                       |        | 0.011                           |
| Bonds angles (°)                                        |        | 1.40                            |
| Ramachandran plot statistics                            |        |                                 |
| Preferred (%)                                           |        | 97.87                           |
| Allowed (%)                                             |        | 1.95                            |
| Outlier (%)                                             |        | 0.18                            |

---
