# Supplementary material for: Structural and biochemical mechanisms of NLRP1 inhibition by DPP9
Source: bioRxiv or medRxiv preprint supplement (doi:10.1101/2020.08.13.250241), 2020-08-14
Supplement: Supplementary file [file media-10.pdf]

Extended Data Table 2: Cryo-EM data collection, 3D reconstruction and model statistics

|                                                | Nlrp1-DPP9                                         | NLRP1-FIIND(S969A)-DPP9                                             |
|------------------------------------------------|----------------------------------------------------|---------------------------------------------------------------------|
| PDB ID                                         | 7CRW                                               | NA                                                                  |
| EMDB ID                                        | EMD-30458                                          | EMD-30459                                                           |
| <b>Data collection</b>                         |                                                    |                                                                     |
| Cryo electron microscope                       | FEI Titan Krios                                    | FEI Titan Krios                                                     |
| Voltage (kV)                                   | 300                                                | 300                                                                 |
| Detector                                       | Gatan K2 Summit with Gatan GIF Quantum (20eV slit) | Gatan K2 Summit with Gatan GIF Quantum (20eV slit) and Cs corrector |
| Magnification                                  | 130,000                                            | 105,000                                                             |
| Pixel size (Å)                                 | 1.061                                              | 1.091                                                               |
| Total electron dose (e-/Å <sup>2</sup> )       | 49.784                                             | 49.969                                                              |
| Exposure rate (e-/pixel/sec)                   | 10.008                                             | 10.621                                                              |
| Defocus range (µm)                             | -1.0 ~ -2.0                                        | -1.0 ~ -2.0                                                         |
| Micrographs collected                          | 7,157                                              | 4,971                                                               |
| Micrographs used                               | 7,033                                              | 4,667                                                               |
| <b>3D reconstruction</b>                       |                                                    |                                                                     |
| Software                                       | RELION 3.1                                         | RELION 3.1                                                          |
| Total extracted particles                      | 2,700,586                                          | 1,725,380                                                           |
| Number of particles used for 3D reconstruction | 182,116                                            | 252,425                                                             |
| Symmetry imposed                               | C1                                                 | C1                                                                  |
| Resolution range (Å)                           | 3.06-4.65                                          | 3.60-6.14                                                           |
| Resolution (Å) after refinement                | 3.64 (FSC=0.143)                                   | 4.29(FSC=0.143)                                                     |
| Resolution (Å) after post-processing           | 3.18 (FSC=0.143)                                   | 3.69(FSC=0.143)                                                     |
| Map sharpening B-factor (Å <sup>2</sup> )      | -50                                                | -100                                                                |
| <b>Refinement and validation</b>               |                                                    |                                                                     |
| Software                                       | Phenix.real_space_refine                           | NA                                                                  |
| Model resolution (Å)                           | 3.3 (FSC=0.5)                                      | NA                                                                  |
| Model composition                              |                                                    |                                                                     |
| Non-hydrogen atoms                             | 16,614                                             | NA                                                                  |
| Protein residues                               | 2057                                               | NA                                                                  |
| Map-model CC (overall/local)                   | 0.85/0.85                                          | NA                                                                  |
| Rwork/Rfree (%)                                | 33.41/33.41                                        | NA                                                                  |
| B factors                                      | 80.08                                              | NA                                                                  |
| R.M.S deviations                               |                                                    |                                                                     |
| Bonds lengths (Å)                              | 0.005                                              | NA                                                                  |
| Bonds angles (°)                               | 0.723                                              | NA                                                                  |
| MolProbity score                               | 1.90                                               | NA                                                                  |
| Clash score                                    | 9.23                                               | NA                                                                  |
| Rotamer outliers (%)                           | 0.60                                               | NA                                                                  |
| EMRinger score                                 | 3.00                                               | NA                                                                  |
| Ramachandran plot statistics                   |                                                    |                                                                     |
| Preferred (%)                                  | 93.91                                              | NA                                                                  |
| Allowed (%)                                    | 5.94                                               | NA                                                                  |
| Outlier (%)                                    | 0.15                                               | NA                                                                  |
